# Supplementary material
Source: PubMed Central journal article supplement (PMC1986598)

Fluorescence assay

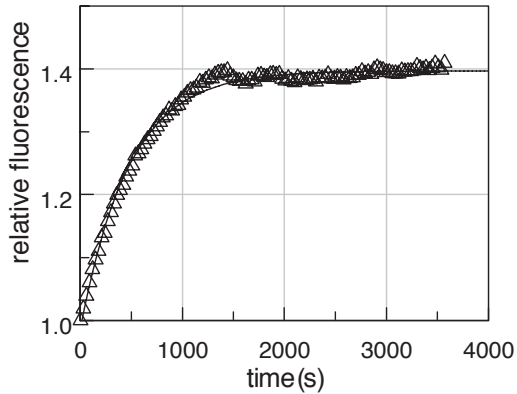

Rate constant =  $0.0021 \pm 3.7e-05 \text{ s}^{-1}$

HPLC assay

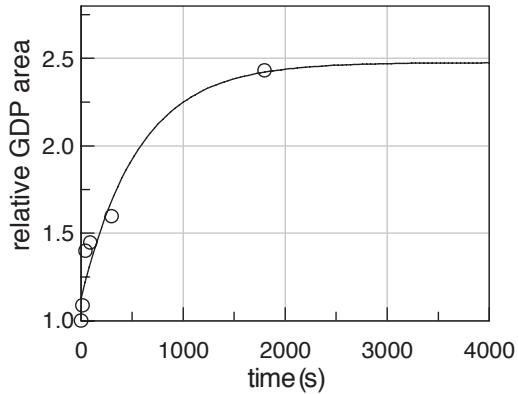

Rate constant =  $0.0018 \pm 9e-04 \text{ s}^{-1}$

Supplement: pnas_0706941104_1.pdf [file pnas_0706941104_1.pdf]

control  
(*k1p-1*(RNAi))

*rga-3/4*(RNAi);  
*k1p-1*(RNAi)

*ect-2*(RNAi)

*rga-3/4*(RNAi);  
*ect-2*(RNAi)

A

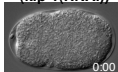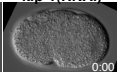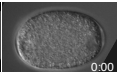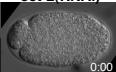

B

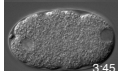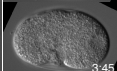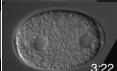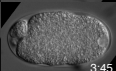

C

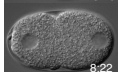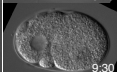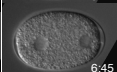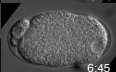

D

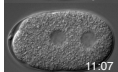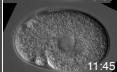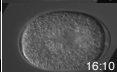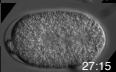

Supplement: pnas_0706941104_2.pdf [file pnas_0706941104_2.pdf]

ect-2(RNAi)

PAR-6

PAR-2

merge

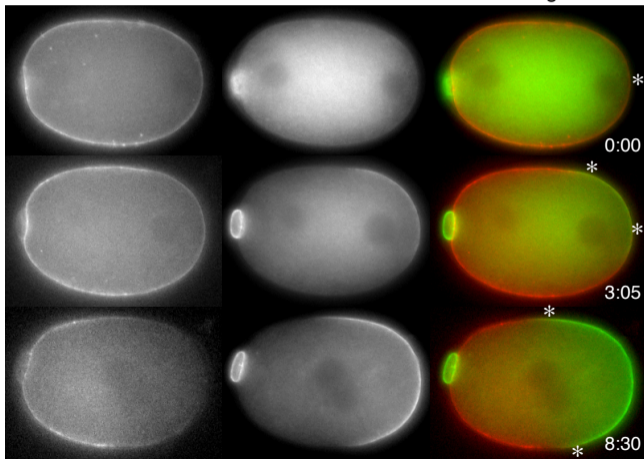

PAR-6 / PAR-2

anterior

posterior

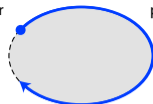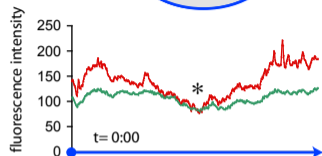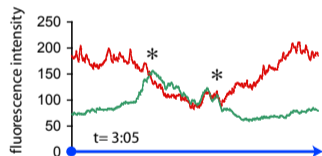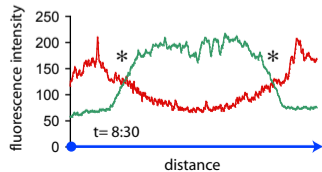

Supplement: pnas_0706941104_3.pdf [file pnas_0706941104_3.pdf]
